# Supplementary material
Source: PubMed Central journal article supplement (PMC5802390)
Supplement: NIHMS845081-supplement-1.pdf [file NIHMS845081-supplement-1.pdf]

Supplemental Table 1

**Supplemental Table 1. Clinicopathological features of cases on TMAs.**

| Gleason grade groups | Stage groups |      |      |        | Total |
|----------------------|--------------|------|------|--------|-------|
|                      | pT2          | pT3a | pT3b | Any N1 |       |
| I (3+3)              | 5            | 4    | 0    | 0      | 9     |
| II (3+4)             | 7            | 13   | 0    | 0      | 20    |
| III (4+3)            | 2            | 6    | 2    | 1      | 11    |
| IV (4+4 / 3+5 / 5+3) | 2            | 4    | 0    | 0      | 6     |
| V (4+5 / 5+4 / 5+5)  | 4            | 5    | 8    | 3      | 20    |
| Total                | 20           | 32   | 8    | 3      | 66    |

p=0.012 (Pearson Chi-square)

## Supplementary Figures.

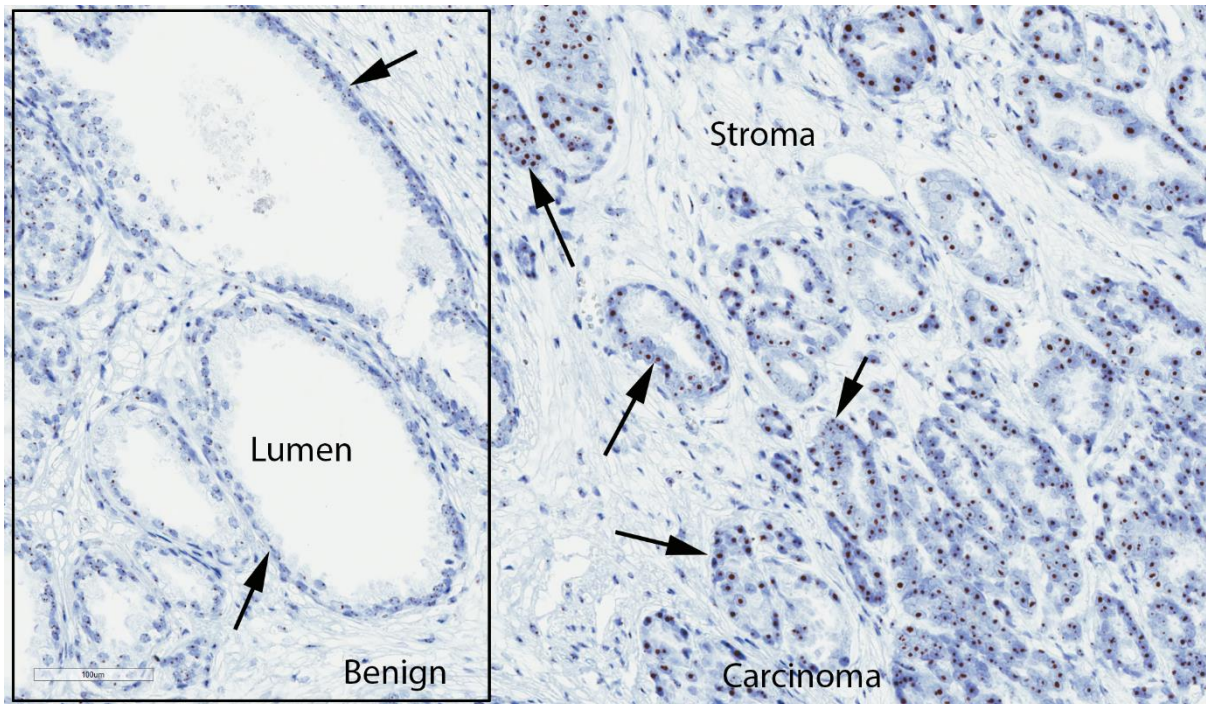

### Supplementary Figure 1. Increased 5'ETS/45S CISH signals in cancer glands.

Low/Medium power image of standard section of prostatectomy showing benign/normal appearing glands on the left (boxed area) and carcinoma glands on the right with increased nuclear signals in carcinoma glands. Arrows indicate glands/acini. Stroma is indicated. Scale bar 100  $\mu\text{m}$ .

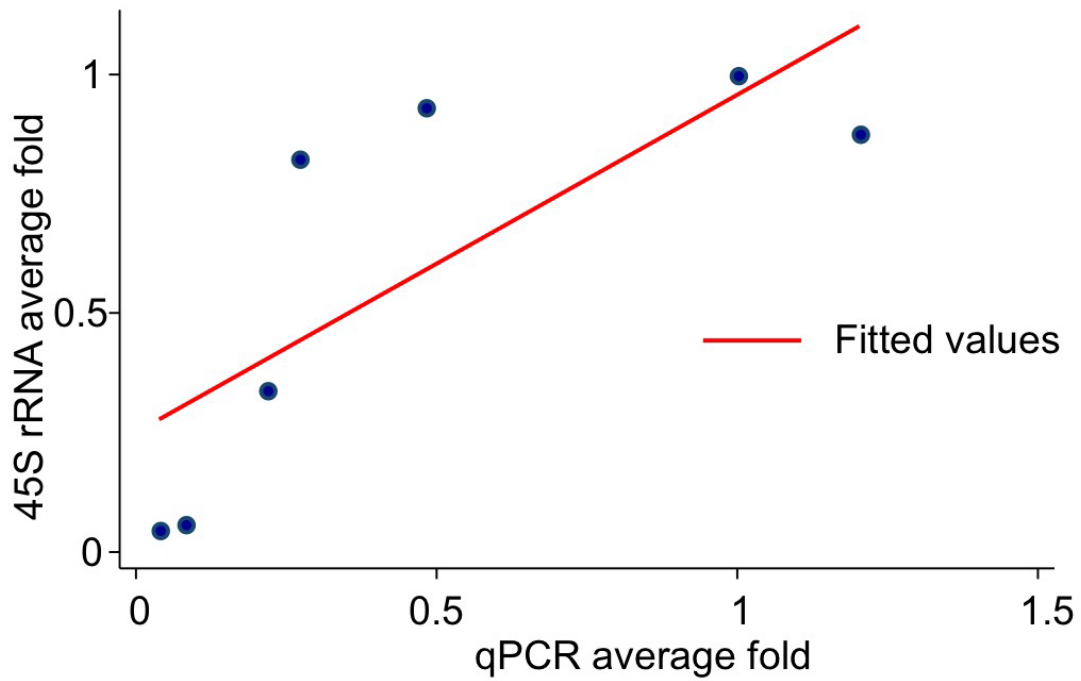

**Supplementary Figure S2. Scatterplot showing correlation between 5'ETS/45S CISH levels by quantitative image analysis and quantitative real time PCR levels from the experiments shown in Figure 2E.**
